# Supplementary material for: Photoinduced energy transfer in multichromophores based on planar Pt–bipyridine–acetylide and octahedral Ru–bipyridine centres
Source: Royal Society of Chemistry journal article supplement (doi:10.1039/b800742j), 2008-01-01
Supplement: b800742j.pdf [file b800742j.pdf]

## Photoinduced energy transfer in multichromophores based on planar Pt-bipyridine-acetylide and octahedral Ru-bipyridine centres

Raymond Ziessel,<sup>\*a</sup> Julie Batcha Seneclauze,<sup>a</sup> Barbara Ventura,<sup>b</sup> Andrea Barbieri,<sup>b</sup> and Francesco Barigelletti<sup>\*b</sup>

### Purification and characterization of the complexes.

All compounds were systematically purified by column chromatography on alumina as solid phase and CH<sub>2</sub>Cl<sub>2</sub>/CH<sub>3</sub>OH as mobile phase. Recrystallization in adequate solvents afforded the analytically pure samples. Selected data for **Pt**: ESI-MS (CH<sub>3</sub>CN) *m/z* 822.3 ([M+H]<sup>+</sup>, 100); FT-IR 2109.7 cm<sup>-1</sup> (ν<sub>C≡C</sub>); elemental analysis Found: C, 61.19, H, 4.42, N, 10.02. C<sub>42</sub>H<sub>38</sub>N<sub>6</sub>Pt requires: C, 61.38; H, 4.66; N, 10.23; for **PtRu**: ESI-MS (CH<sub>3</sub>CN) *m/z* 1380.2 ([M-PF<sub>6</sub>]<sup>+</sup>, 100), 617.5 ([M-2PF<sub>6</sub>]<sup>2+</sup>, 40); FT-IR 2109.3 cm<sup>-1</sup> (ν<sub>C≡C</sub>); elemental analysis C, 48.52, H, 3.23, N, 8.87. C<sub>62</sub>H<sub>54</sub>F<sub>12</sub>N<sub>10</sub>P<sub>2</sub>PtRu requires C, 48.82; H, 3.57; N, 9.18. <sup>1</sup>H NMR in d<sub>6</sub>-acetone δ 9.58 (1H, d, <sup>3</sup>J = 6.8 Hz), 9.36 (1H, d, <sup>3</sup>J = 6.0 Hz), 8.86-8.79 (4H, 4 line m), 8.73 (1H, d, <sup>3</sup>J = 8.5 Hz), 8.67-8.66 (4H, 2 line m), 8.57 (1H, s), 8.49 (1H, d, <sup>3</sup>J = 7.6 Hz), 8.42 (1H, d, <sup>3</sup>J = 8.0 Hz), 8.23-8.11 (8H, 8 line m), 8.05 (1H, d, <sup>3</sup>J = 5.0 Hz), 8.01-7.93 (4H, 8 line m), 7.82-7.79 (3H, 5 line m), 7.63-7.50 (5H, 9 line m), 7.41 (1H, t, <sup>3</sup>J = 6.6 Hz), 1.46 ppm (18H, s). for **PtRu<sub>2</sub>**: ESI-MS (CH<sub>3</sub>CN) *m/z* 2083.2 ([M-PF<sub>6</sub>]<sup>+</sup>, 100), 969.0 ([M-2PF<sub>6</sub>]<sup>2+</sup>, 80); 598.1 ([M-3PF<sub>6</sub>]<sup>3+</sup>, 50); FT-IR 2114.4 cm<sup>-1</sup> (ν<sub>C≡C</sub>); elemental analysis C, 43.78, H, 2.93, N, 8.49. C<sub>82</sub>H<sub>70</sub>F<sub>24</sub>N<sub>14</sub>P<sub>4</sub>PtRu<sub>2</sub> requires: C, 44.19; H, 3.17; N, 8.80. <sup>1</sup>H NMR in d<sub>6</sub>-acetone δ 9.18 (2H, d, <sup>3</sup>J = 5.8 Hz), 8.84-8.69 (13H, 11 line m), 8.21-7.98 (22H, 13 line m), 7.84 (2H, s), 7.72-7.50 (13H, 12 line m), 1.46 ppm (18H, s).

### Electrochemistry.

With reference to the Table below, to notice the following.

- 1) The oxidation on the **PtRu** and **PtRu<sub>2</sub>** complexes is Ru based due to the clear reversibility compared to the irreversible oxidation of the **Pt** precursor at higher potential.
- 2) The first reduction on the **PtRu** and **PtRu<sub>2</sub>** complexes is based on the Ru part, i.e., on the ethynylbpy ligand. A second very close reversible reduction is likely localized on the Pt part, the third reduction is localized on the Ru-unsubstituted bpy.
- 3) The third reduction of the unsubstituted bpy is not observed, as usually for [Ru(bpy)<sub>3</sub>]<sup>2+</sup>, or the Ru complex which has a second two electron reduction wave.

**Table .** Electrochemical data for the Pt/Ru complexes.<sup>a</sup>

| Cmpds                        | E <sup>0</sup> <sub>ox</sub> (ox, soln) (V), | E <sup>0</sup> <sub>red</sub> (red, soln) (V), |
|------------------------------|----------------------------------------------|------------------------------------------------|
|                              | ΔE (mV)                                      | ΔE (mV)                                        |
| <b>Pt</b>                    | +1.37 (irrev, Ia/Ic ≈ 0)                     | -1.43 (70)                                     |
| <b>Pt(bpy)Cl<sub>2</sub></b> | +1.38 (irrev, Ia/Ic ≈ 0)                     | -1.38 (80)                                     |
| <b>PtRu</b>                  | +1.32 (70)*                                  | -1.33 (60), -1.38 (70), -1.61 (60)             |
| <b>PtRu<sub>2</sub></b>      | +1.32 (70)*                                  | -1.34 (60), -1.39 (60), -1.63 (60)             |
| <b>Ru</b>                    | +1.40 (60)                                   | -1.17 (60), -1.55 (100)**                      |

<sup>a</sup>Potentials determined by cyclic voltammetry in deoxygenated CH<sub>3</sub>CN solution, containing 0.1 M TBAPF<sub>6</sub>, at a solute concentration of ca. 1.5 mM and at rt. Potentials were standardized versus ferrocene (Fc) as internal reference and converted to the SCE scale assuming that E<sub>1/2</sub> (Fc/Fc<sup>+</sup>) = +0.38 V (ΔE<sub>p</sub> = 60 mV) vs SCE. Error in half-wave potentials is ±15 mV, all potential correspond to single electron transfer processes unless otherwise noticed. For irreversible processes the peak potentials (E<sub>ap</sub> or E<sub>cp</sub>) are quoted. (\*) The visibility is perturbed by adsorption of the complex on the electrolyte surface. (\*\*) Two-electron process.

### **Pt→Ru energy transfer in PtRu and PtRu<sub>2</sub>**

From the luminescence properties of Pt and Ru, **Pt→Ru** energy transfer is exothermic by ca. 0.4 eV. For **PtRu** and **PtRu<sub>2</sub>**, the electronic interaction between the partners is likely weak, as suggested by the fact that the Ru-based unit largely keeps its individual electronic properties in the MLCT absorption region. On this basis, we tentatively discard the dual electron exchange (i.e., through-bond) Dexter energy transfer.<sup>1</sup> For the dipole-dipole Förster mechanism,<sup>2</sup> evaluation of the spectral overlap  $J_F$  between the luminescence profile of **Pt** and the absorption profile of bound **Ru** (which overlaps that of the Ru-based unit in **PtRu**, Figure 1 of main text), allows the estimate of the **Pt→Ru** energy transfer rate constant,  $k_{en}^F$ , at an intermetal separation  $d_{cc} \cong 9 \text{ \AA}$ , eqs. 1-3,

$$J_F = \frac{\int F(\bar{\nu})\epsilon(\bar{\nu})/\bar{\nu}^4 d\bar{\nu}}{\int F(\bar{\nu})} \quad (1)$$

$$k_{en}^F = \frac{8.8 \times 10^{-25} K^2 \phi_{em}}{n^4 \tau_{em} d_{cc}^6} J_F \quad (2)$$

$$R_o (\text{\AA}) = 9.79 \times 10^3 (K^2 n^{-4} \phi_{em} J_F)^{1/6} \quad (3)$$

where  $F(\bar{\nu})$  and  $\epsilon(\bar{\nu})$  are the luminescence and absorption profiles on an energy scale ( $\text{cm}^{-1}$ ) of **Pt** and **Ru**, respectively,  $K^2$  is a geometric factor (taken as  $2/3$ );  $\phi_{\text{em}}$  and  $\tau_{\text{em}}$  are the luminescence quantum yield and lifetime, respectively, of **Pt** (the excitation energy donor),  $n$  is the refractive index of the solvent, the intermetal distance  $d_{\text{cc}}$  is estimated  $9 \text{ \AA}$  from molecular modeling, and  $R_0$  is the critical transfer radius. Results were  $J_{\text{F}} = 8.2 \times 10^{-15} \text{ cm}^3 \text{ M}^{-1}$ ,  $k_{\text{en}}^{\text{F}} = 1.04 \times 10^8 \text{ s}^{-1}$  (at  $9 \text{ \AA}$ ), and  $R_0 = 25.2 \text{ \AA}$ . Figure SI\_1 provides a schematic layout for the Pt- and Ru-based energy levels involved.

### SI References

- <sup>1</sup> D. L. Dexter, *J. Chem. Phys.*, 1953, 21, 836.
- <sup>2</sup> T. Förster, *Discuss. Faraday Soc.*, 1959, 27, 7.

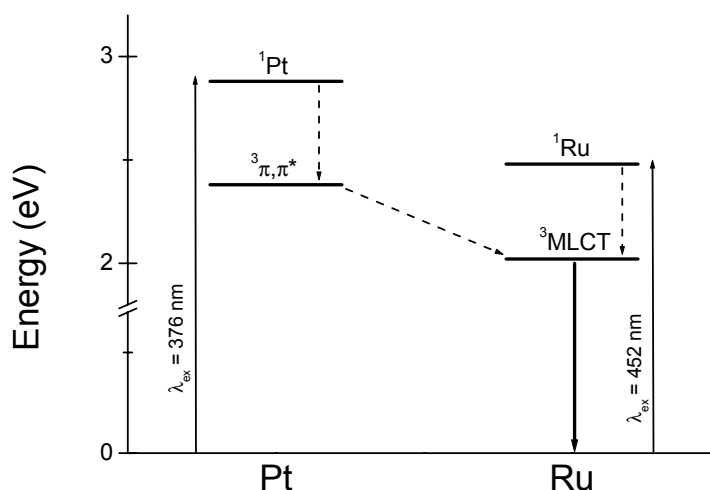

Figure SI\_1. Energy layout for the Pt- and Ru-based levels in **PtRu** and **PtRu<sub>2</sub>**. ILCT levels are not indicated.
